# Supplementary material for: Acoustically shaped DNA-programmable materials
Source: PubMed Central journal article supplement — Nat Commun. 2024 Aug 11;15:6875. doi: 10.1038/s41467-024-51049-7 (PMC11317520; doi:10.1038/s41467-024-51049-7), 2024-08-11
Supplement: 41467_2024_51049_MOESM1_ESM.pdf [file 41467_2024_51049_MOESM1_ESM.pdf]

# Supplementary Information

## **Acoustically Shaped DNA-Programmable Materials**

Z.A. Arnon<sup>1</sup>, S. Piperno<sup>2</sup>, D.C. Redeker<sup>1</sup>, E. Randall<sup>1</sup>, A.V. Tkachenko<sup>3</sup>, H. Shpaisman<sup>2</sup> and O. Gang<sup>1,3,4\*</sup>

<sup>1</sup>Department of Chemical Engineering, Columbia University, New York, NY, USA

<sup>2</sup>Department of Chemistry and Institute for Nanotechnology and Advanced Materials, Bar-Ilan University, Ramat Gan, Israel

<sup>3</sup>Center for Functional Nanomaterials, Brookhaven National Laboratory, Upton, NY, USA

<sup>4</sup>Department of Applied Physics and Applied Mathematics, Columbia University, New York, NY, USA

\*og2226@columbia.edu

### **Supplementary Methods**

#### **Acoustic Transducer**

A Y+128° X-propagation lithium niobate (LiNbO<sub>3</sub>) wafer (500 μm thick) was coated with a layer of AZ5214 photoresist (MicroChem, Newton, MA) through spin-coating. The coated wafer underwent lithography using a maskless aligner (MLA 150-Heidelberg) for precise patterning and later treated with a photoresist developer (Microchem AZ726) for development. Subsequently, an e-beam evaporator (Bestec) was used to deposit a double metal layer (Cr/Au, 100Å/1000Å) onto the wafer. Following this procedure, a lift-off process was employed to create the interdigital transducers (IDTs).

#### **Crystallites Orientations**

Images of before and after the acoustic field was applied were used to assess the orientation of crystals, as seen in Supplementary Figure 2. The angle measured was from the parallel to the capillary wall. The chosen angle was always between 0°-45° as shown in Figure 2a. Analysis was performed using *Fiji*<sup>1</sup> (*version 1.54f*).

#### **Small-Angle X-ray Scattering (SAXS) of Assembled Structures**

The SAXS measurements were performed at the Complex Materials Scattering (CMS) beamline at the National Synchrotron Light Source II (NSLS-II) at Brookhaven National Laboratory (BNL) in Upton, NY. The 2D scattering data was collected on area detectors located downstream of the sample's position. Area images were integrated into a one-dimensional (1D)  $I(q)$  scattering curve as a function of the scattering vector  $q$ , where  $q = 4\frac{\pi}{\lambda} \sin\left(\frac{\theta}{2}\right)$  with  $\lambda$  and  $\theta$  being the wavelength of the incident X-rays and the full scattering angle, respectively. The resultant 1D curves spanned

22 roughly  $0.04 \text{ nm}^{-1}$  to  $1 \text{ nm}^{-1}$  with a resolution of  $0.002 \text{ nm}^{-1}$ . The structure factor  $S(q)$  was obtained  
 23 by dividing  $I(q)$  by the corresponding particle form factor  $P(q)$ .

|                                                                                |            |
|--------------------------------------------------------------------------------|------------|
| Beamline                                                                       | 11-BM CMS  |
| Photon Energy (keV)                                                            | 13.5       |
| Horizontal $\times$ Vertical Beam size<br>( $\mu\text{m} \times \mu\text{m}$ ) | 200 x 200  |
| Approximate Flux (photons/sec)                                                 | $10^{11}$  |
| Sample-to-Detector Distance (m)                                                | 5.05       |
| Detector Manufacturer                                                          | Dectris    |
| Detector Model                                                                 | Pilatus 1M |
| Detector Pixel Size ( $\mu\text{m} \times \mu\text{m}$ )                       | 172 x 172  |

24 **Supplementary Table 1.** X-ray beam characteristics and setup details at the CMS (NSLS-II) beamline

25 In this work, we implement modeling of the presented analysis using the ScatterSim software  
 26 package, a python package that implements a scattering formalism for superlattices<sup>2,3</sup>. This  
 27 formalism can generically model the scattering from arbitrary anisotropic nano-objects within the  
 28 unit cell of a regular superlattice. We used this library to perform the modeling for the simple cubic  
 29 crystal, with the code being available for download on Git Hub<sup>3</sup>.

## 30 **Supplementary Discussion**

### 31 **Acoustic Field Considerations**

32 SAWs are generated by IDTs fabricated with photolithography to convert electrical signals  
 33 into acoustic waves through the piezoelectric effect of a substrate. The acoustic force applied on  
 34 particles is dependent on the acoustic contrast between the medium and particles, which is  
 35 sufficient for most systems of particles in aqueous media. The SSAW-induced pressure generates  
 36 a force  $F_{ac}$ , applied on small particles, has a form:

$$37 \quad F_{ac} = \frac{4}{3} \pi r^3 E_{ac} q \sin(2kx) \phi$$

38 where  $r$  is the radius of the particle,  $E_{ac}$  is the acoustic energy density,  $q$  is the wave number,  $x$  is  
 39 the distance of the particle from the node and  $\phi$  is the acoustic contrast factor between the particle  
 40 and the medium (water).

41 Acoustic contrast factor

42 To estimate the acoustic contrast factor  $\phi$  of our material, we first consider a hypothetical case  
43 when DNA origami fills entire volume of the frame. The density ratio of DNA to water is  
44 approximately  $\rho_{DNA}/\rho_{H_2O} \approx 1.7$  which corresponds to

45 
$$\phi_{DNA} = \frac{5\rho_{DNA} - 2\rho_{H_2O}}{2\rho_{DNA} + \rho_{H_2O}} - \frac{\beta_{DNA}}{\beta_{H_2O}} \approx 1.5 - \frac{\beta_{DNA}}{\beta_{H_2O}}$$

46 where  $\beta_{DNA}/\beta_{H_2O}$  is the compressibility ratio of DNA to water. Since we know, based on  
47 experimental evidence, that gold particles and DNA frames are pushed to the same locations  
48 (Supplementary Figure 4), we can conclude that  $\phi_{DNA}$  is positive. Hence, the compressibility ratio  
49  $\frac{\beta_{DNA}}{\beta_{H_2O}}$  is between 0 and 1.5. Plotting a particle edge length threshold ( $L^*$ ) vs the compressibility  
50 ratio (Supplementary Figure 5) shows that even for energy of  $200 \text{ J/m}^3$  (See ‘Acoustic Force  
51 Considerations’), individual particles need to be well above a threshold of 30 nm in order for the  
52 acoustic force to push them efficiently.

53 Acoustic Force Considerations

54 The force applied by the waves on particles is dependent on the position of the particle, where at  
55 specific  $n\pi$  locations called the ‘nodes’, the force will be reduced to zero. Small particles with  
56 positive acoustic contrast around the nodes are pushed into the nodes, where they will stay for as  
57 long as the wave is applied. As estimated above, the contrast factors for individual DNA frames  
58 as well as for the larger self-assembled structures are expected be close to the volume fraction of  
59 DNA in them, *i.e.*  $\phi \sim 0.1$ . For a particle to be affected by the SSAW, its energy difference between  
60 the node and antinode positions,  $VE_{ac}\phi$ , must exceed  $kT$ . To estimate the particles size threshold  
61 ( $L^*$ ) that will be affected by the acoustic force, the acoustic energy density ( $E_{ac}$ ) must be estimated  
62 first. By using polystyrene beads of  $1 \mu\text{m}$  (Supplementary Movie 5) and calculating the velocity  
63 of the beads under the acoustic force, we estimated that the acoustic energy density is  $E_{ac} \approx$   
64  $50 \text{ J/m}^3$  (for more details on the calculation, see Supplementary Table 2). This corresponds to the  
65 particle size range of  $L \gtrsim \left(\frac{kT}{E_{ac}\phi}\right)^{\frac{1}{3}} \approx 80 \text{ nm}$  (Supplementary Figure 5). This means that individual  
66 DNA frames ( $\sim 30 \text{ nm}$ ) should not be affected, while the crystalline particles larger than the critical  
67 nucleus typically are.

| Parameter                  | Description                                  | Equation                                             | Value    |
|----------------------------|----------------------------------------------|------------------------------------------------------|----------|
| $\rho$ ( $kg/m^3$ )        | Density of polystyrene particles             | -                                                    | 1050     |
| $\phi_w$                   | Acoustic contrast of polystyrene in water    | -                                                    | 0.193    |
| $r$ ( $m$ )                | Radius of polystyrene particles              | -                                                    | 0.5e-6   |
| $\eta$ ( $N \cdot s/m^2$ ) | Viscosity                                    | -                                                    | 6.5e-4   |
| $d$ ( $m$ )                | Distance particles travel (from movie S5)    | -                                                    | 75e-6    |
| $t$ ( $s$ )                | Time for particles to travel (from movie S5) | -                                                    | 18       |
| $v$ ( $m/s$ )              | Velocity                                     | $d/t$                                                | 4.16e-6  |
| $F_{drag}$ ( $N$ )         | Drag force                                   | $6\pi\eta r v$                                       | 2.55e-14 |
| $m$ ( $kg$ )               | Particle mass                                | $\frac{4}{3}\pi r^3 \rho$                            | 5.5e-16  |
| $F_{calculated}$ ( $N$ )   | Total force on particles                     | $m \cdot a$                                          | 1.27e-22 |
| $F_{ac}$ ( $N$ )           | Acoustic force on particles                  | $F_{calculated} + F_{drag}$                          | 2.55e-14 |
| $q$ ( $m^{-1}$ )           | Wavenumber                                   | $1/\lambda$                                          | 5000     |
| $E_{ac}$ ( $J/m^3$ )       | Acoustic Energy Density                      | $\frac{3}{4\pi r^3 q \sin(2kx) \phi_w} \cdot F_{ac}$ | 50.5     |

68 **Supplementary Table 2.** Acoustic energy density calculation table. The acoustic force calculation was performed for  
69 microparticles with a known diameter, density, compressibility and acoustic contrast factor<sup>4</sup> in a capillary tube filled  
70 with water (0.05 x 1 mm). IDT 19.34 MHz and Amplitude of 20Vpp. The velocity and acceleration of the particles  
71 were calculated by measuring the time it takes for the particles to cover a known distance. We used the time it takes  
72 all dispersed particles to reach the nodes and considered half the node distance as travel distance.

### 73 Theoretical Modelling Parameters

74 The table below (Supplementary Table 3) lists the parameters used for modeling. Out of them,  
75  $\Gamma$  was used as a tuning parameter for the unmodified nucleation and growth theory that describes  
76 the no-wave data. Two additional fitting parameters are specific to the infusion model. The rest of  
77 the parameters were determined based on the known geometrical and thermodynamic properties  
78 of the building blocks, and the experimental conditions. In particular, the diffusion coefficient was  
79 determined by Einstein relationship (by setting hydrodynamic radius to  $a$ ):

80  $D = \frac{kT}{6\pi\eta a} = 5.9 \cdot 10^{-12} \frac{m^2}{s}$ . The sequence-specific hybridization entropy of each DNA duplex

81 was found to be  $160 \frac{cal}{K \cdot mol}$ . There are 4 DNA duplexes in each bond, and 3 bonds per octahedral  
82 building block in the cubic lattice, which gives:

$$83 \quad \Delta S/kT = \frac{12 \cdot 160 \frac{cal}{K \cdot mol}}{RT} = 3.0 K^{-1}.$$

| Parameter | $a$   | $c_0$ | $D$                                | $\Delta S/kT$ | $\Gamma$         | $\varepsilon$    | $\kappa$                     |
|-----------|-------|-------|------------------------------------|---------------|------------------|------------------|------------------------------|
| Value     | 40 nm | 40 nM | $5.9 \cdot 10^{-12} \frac{m^2}{s}$ | $3.0 K^{-1}$  | 7.5<br>(fitting) | 400<br>(fitting) | $0.0005 s^{-1}$<br>(fitting) |

84 **Supplementary Table 3.** Parameters for the theoretical model used in the study.

85 **Supplementary Tables**

86 **Internal DNA Staples**

| Sequence Name | Sequence                                                |
|---------------|---------------------------------------------------------|
| OCT-Staple-1  | GCCTTGAATCTTTCCGGAACCGCTCCAGAGCCAGAGCCGCCAGCATT         |
| OCT-Staple-2  | ATAAGGCGCCAAAAGTTGAGATTTAGGATAACGGACCAGTCA              |
| OCT-Staple-3  | GATGGTTGGGAAGAAAAATCCACCAGAAATAATTGGGCTTGA              |
| OCT-Staple-4  | GGACGTTTAATTTTCGACGAGAAACACCACCACTAATGCAGAT             |
| OCT-Staple-5  | ATTTTAAGAAGCTGGCTTGAATTATCAGTGA                         |
| OCT-Staple-6  | TCAGAACCGCCACCCTCTCAGAGTATTAGC                          |
| OCT-Staple-7  | TCAGAGCGCCACCACATAATCAAAATCAGAACGAGTAGTATG              |
| OCT-Staple-8  | AACCAGACGCTACGTTAATAAAACGAACATACCACATTCAGG              |
| OCT-Staple-9  | GTTTGCCTATTACAGGCAGGTCAGACGCCACCACACCACC                |
| OCT-Staple-10 | ACATAACTTGGCCCTAACTTTAATCATTGCATTATAACAACATTATTACAGGTAG |
| OCT-Staple-11 | CATGTCACAAACGGCATTAAATGTGAGCAATTCGCGTTAAAT              |
| OCT-Staple-12 | AAGATTGTTTTTAACCAAGAAACCATCGACCCAAAAACAGG               |
| OCT-Staple-13 | CAGCTCATATAAGCGTACCCCGGTTGATGTGTCGGATTCTCC              |
| OCT-Staple-14 | GTTAAAATTCGCATTATAAACGTAAACTAG                          |
| OCT-Staple-15 | AGCACCATTACCATTACAGCAAATGACGGGA                         |
| OCT-Staple-16 | GTCACCAGAGCCATGGTGAATTATACCAATCAGAAAAGCCT               |
| OCT-Staple-17 | CCGACTTATTAGGAACGCCATCAAAAATGAGTAACAACCCCA              |
| OCT-Staple-18 | AATTATTGTTTTCATGCCTTTAGCGTCAGATAGCACGGAAAC              |
| OCT-Staple-19 | CTTCGCTGGGCGCAGACGACAGTATCGGGGCACCGTCGCCATTCAGGCTGCGCA  |
| OCT-Staple-20 | ACAAAGAAATTTAGGTAGGGCTTAATTGTATACAACGGAATC              |
| OCT-Staple-21 | TGACCTACTAGAAAAAGCCCCAGGCAAAGCAATTTTCATCTTC             |
| OCT-Staple-22 | ATAATTAATTTAAAAAACTTTTTCAAACCTTTTAACAACGCC              |
| OCT-Staple-23 | AGGCGTTAAATAAGAAGACCGTGTGCGCAAG                         |
| OCT-Staple-24 | TGCCGGAAGGGGACTCGTAACCGTGCATTATATTTTAGTTCT              |
| OCT-Staple-25 | CTCCAGCCAGCTTTCCCCTCAGGACGTTGG                          |
| OCT-Staple-26 | CAGTTTGAATGTTTAGTATCATATGCGTAGAATCGCCATAGC              |
| OCT-Staple-27 | TGTAGATATTACGCGGCGATCGGTGCGGGCGCCATCTTCTGG              |
| OCT-Staple-28 | AACATGTACGCGAGTGGTTTAAAATACCTAAACACATTCTTACCAGTATAAAGC  |
| OCT-Staple-29 | CGCTGGTGCTTTCCTGAATCGGCCAACGAGGGTGGTGATTGCCCTTACCAGCCT  |
| OCT-Staple-30 | AACAAAAATAACTAGGTCTGAGAGACTACGCTGAGTTTCCCT              |
| OCT-Staple-31 | AACAGTACTTGAAAACATATGAGACGGGTCTTTTTTAATGGA              |
| OCT-Staple-32 | TAGAATCCATAAATCATTTAACAATTTCTCCCGGCTTAGGTT              |
| OCT-Staple-33 | GTAAATCGTCGCTATTGAATAACTCAAGAA                          |
| OCT-Staple-34 | TTGCGTATTGGGCGCCCGGGGTGCGCTC                            |
| OCT-Staple-35 | TTTACCAGCATTAAAGTCGGGAAACCTGATTTGAATTACCCA              |
| OCT-Staple-36 | GCCAGCTAGGCGATAGCTTAGATTAAGACCTTTTTAACCTGT              |
| OCT-Staple-37 | ACTGCCCTTGCCCGTTGCAGCAAGCGGCAACAGCTTTTTCT               |
| OCT-Staple-38 | GGGTTATTTAATTACAATATATGTGAGTAATTAATAAGAGTCAATAGTGAATTT  |
| OCT-Staple-39 | TCCAAATCTTCTGAATTATTTGCACGTAGGTTTAACGCTAACGAGCGTCTTTCC  |

|               |                                                        |
|---------------|--------------------------------------------------------|
| OCT-Staple-40 | CAGATATTACCTGAATACCAAGTTACAATCGGGAGCTATTTT             |
| OCT-Staple-41 | ACGCGAGGCTACAACAGTACCTTTTACAAATCGCGCAGAGAA             |
| OCT-Staple-42 | GCACCCAGCGTTTTTATCCGGTATTCTAGGCGAATTATCA               |
| OCT-Staple-43 | AAGCCTTAAATCAAGACTTGCGGAGCAAAT                         |
| OCT-Staple-44 | ATTGCGTAGATTTTCAAAACAGATTGTTTG                         |
| OCT-Staple-45 | TGAATATTATCAAAAATAATGGAAGGGTTAATATTTATCCCAA            |
| OCT-Staple-46 | CCTACCAACAGTAATTTTATCCTGAATCAAACAGCCATATGA             |
| OCT-Staple-47 | GATTATAAAGAAACGCCAGTTACAAAATTTACCAACGTCAGA             |
| OCT-Staple-48 | TTTCAATAGAAGGCAGCGAACCTCCCGATTAGTTGAAACAATAACGGATTCCGC |
| OCT-Staple-49 | GATATTCTAAATTGAGCCGGAACGAGGCCCAACTGGCGCATAGGCTGGCTGAC  |
| OCT-Staple-50 | GGTTGATTTTCCAGCAGACAGCCCTCATTTCGTCACGGGATAG            |
| OCT-Staple-51 | AGTACCGAATAGGAACCCAAACGGTGTAACTCAGGAGGTTT              |
| OCT-Staple-52 | CAAGCCCCACCCTTAGCCCGAATAGGACGATCTAAAGTTT               |
| OCT-Staple-53 | CAGAGCCACCACCCTCTCAGAACTCGAGAG                         |
| OCT-Staple-54 | AAGGGAACCGAAGTACGAGCAGCGGTATCAT                        |
| OCT-Staple-55 | GGACAGAGTTACTTTGTGCGAAATCCGCGTGTATCACCGTACG            |
| OCT-Staple-56 | GCTCCATTGTACCGTAACACTGAGTTAGTTAGCGTAACT                |
| OCT-Staple-57 | CGCTGAATTACCCTAATCTTGACAAGACAGACCATGAAAGA              |
| OCT-Staple-58 | TGTCGTCATAAGTACAGAACCGCCACCCATTTTCACAGTACAACTACAACGCC  |
| OCT-Staple-59 | ATGACCACTCGTTTGGCTTTTGCAAAAGTTAGACTATATTCATTGAATCCCCT  |
| OCT-Staple-60 | GTAATACGCAAACATGAGAGATCTACAACACTAGCTGAGGCCGG           |
| OCT-Staple-61 | AGAACCCCAAATCACCATCTGCGGAATCGAATAAAAATTTTT             |
| OCT-Staple-62 | AGACAGTTCATATAGGAGAAGCCTTTATAACATTGCCTGAGA             |
| OCT-Staple-63 | GTAAAGATTCAAAGGCCTGAGTTGACCCT                          |
| OCT-Staple-64 | GGTAATAGTAAATGTAAGTTTTACTAT                            |
| OCT-Staple-65 | GTCCAATAGCGAGAACCAGACGACGATTTCAACGCAAGGGA              |
| OCT-Staple-66 | CCAAAATACAATATGATATTCAACGTTAGGCTATCAGGTAA              |
| OCT-Staple-67 | CATAACCTAAATCAACAGTTCAGAAAACGTCATAAGGATAGC             |
| OCT-Staple-68 | GTCTGGATTTTGCCTTTTAAATGCAATGGTGAGAAATAAATTAATGCCGGAGAG |
| OCT-Staple-69 | GGGCGACCCCAAAAGTATGTTAGCAAACATAAAGAGTCACAATCAATAGAAAAT |
| OCT-Staple-70 | TATAAAGCATCGTAACCAAGTACCGCACCGGCTGTAATATCC             |
| OCT-Staple-71 | CAACATGATTTACGAGCATGGAATAAGTAAGACGACAATAAA             |
| OCT-Staple-72 | CATCCTATTACGCTAAAAGGTAAGTAAAAAGCAAGCCGTTT              |
| OCT-Staple-73 | GATAAGTCCTGAACAACTGTTTAAAGAGAA                         |
| OCT-Staple-74 | TAAAGGTGGCAACATAGTAGAAAATAATAA                         |
| OCT-Staple-75 | AGACACCTTACGCAGAACTGGCATGATTTCTGTCCAGACAA              |
| OCT-Staple-76 | CTCCTTAACGTAGAAAACCAATCAATAATTCATCGAGAACAGA            |
| OCT-Staple-77 | CGGAATAATTCAACCGAGCCAAAGACTTATTTTAAACGCAA              |
| OCT-Staple-78 | TTATTTTTACCACAATGCAGAACGCGGAAAAATCTTTCCTTATCATTCCAAG   |
| OCT-Staple-79 | CAGCCTTGGTTTTGTATTAAGAGGCTGACTGCCTATATCAGA             |
| OCT-Staple-80 | GGAAGCGCCACAAACAGTTAATGCCCCGACTCCTCAAGATA              |
| OCT-Staple-81 | GAGATAACATTAGAAGAATAACATAAAAAGGAAGGATTAGGA             |
| OCT-Staple-82 | GTCAGAGGGTAATTGAGAACACCAAAATAG                         |

|                |                                                         |
|----------------|---------------------------------------------------------|
| OCT-Staple-83  | AAGTTTTAACGGGGTCGGAGTGTAGAATGG                          |
| OCT-Staple-84  | CAGTGCCTACATGGGAATTTACCGTTCCACAAGTAAGCAGAT              |
| OCT-Staple-85  | AGCGTCACGTATAAGAATTGAGTTAAGCCCTTTTTAAGAAAG              |
| OCT-Staple-86  | AAAGCGCCAAAGTTTATCTTACCGAAGCCCAATAATGAGTAA              |
| OCT-Staple-87  | TGCTAAACAGATGAAGAAACCACCAGAATTTAAAAAAGGCT               |
| OCT-Staple-88  | GAGAATAGAGCCTTACCGTCTATCAAATGGAGCGGAATTAGA              |
| OCT-Staple-89  | CCAAAAGGAAAGGACAACAGTTTCAGCGAATCATCATATTCC              |
| OCT-Staple-90  | TTCACGTTGAAAACTTTGCGAATGGGATTT                          |
| OCT-Staple-91  | GTCCACTATTAAGAACCAGTTTTGGTTCC                           |
| OCT-Staple-92  | TCAAAGGGAGATAGCCCTTATAAATCAAGACAACAACCATCG              |
| OCT-Staple-93  | ATAGCCCGCGAAAATAATTGTATCGGTTTCGCCGACAATGAGT             |
| OCT-Staple-94  | GAAATCGATAACCGGATACCGATAGTTGTATCAGCTCCAACG              |
| OCT-Staple-95  | ATTAAGTATAAAGCGGCAAGGCAAAGAACTAATAGGGTACC               |
| OCT-Staple-96  | CACGACGAATTCGTGTGGCATCAATTCCTTTAGCAAAAATTACG            |
| OCT-Staple-97  | CAGGTCGACTCTAGAGCAAGCTTCAAGGCG                          |
| OCT-Staple-98  | TAACTGTTTAGCTATTTTCGCATTCATTC                           |
| OCT-Staple-99  | GAGTCGTTGTAAACGCCAGGGTTTTCCAAAGCAATAAAGCC               |
| OCT-Staple-100 | CGCGAGCTTAGTTTTTCCCAATTCTGCGCAAGTGTAAGCCCT              |
| OCT-Staple-101 | AGTAGATTGAAAAGAATCATGGTCATAGCCGGAAGCATAAGT              |
| OCT-Staple-102 | CATATAACTAATGAACACAACATACGAGCTGTTTCTTTGGGG              |
| OCT-Staple-103 | ATGTTTTGCTTTTGATCGGAACGAGGGTACTTTTTCTTTGATAAGAGGTCATT   |
| OCT-Staple-104 | AGAAGCAACCAAGCCAAAAGAATACACTAATGCCAAAACCTC              |
| OCT-Staple-105 | GAGGAAGCAGGATTCGGGTAAAATACGTAAAACACCCCCAG               |
| OCT-Staple-106 | AACAGGTCCCGAAATTGCATCAAAAAGATCTTTGATCATCAG              |
| OCT-Staple-107 | TCAAAGCGAACCAGACCGTTTTATATAGTC                          |
| OCT-Staple-108 | GCTTTGAGGACTAAAAGCAACGGGGAGTT                           |
| OCT-Staple-109 | AAGTTTCAGACAGCCGGGATCGTCAACCTTCTGTAGCTCAAC              |
| OCT-Staple-110 | CAGCGAACATTAAGAGAGTACCTTTACTGAATATAATGAA                |
| OCT-Staple-111 | AAAGGCCAAATATGTTAGAGCTTAATTGATTGCTCCATGAGG              |
| OCT-Staple-112 | CGATTATAAGCGGAGACTTCAAATATCGCGGAAGCCTACGAAGGCACCAACCTA  |
| OCT-Staple-113 | GGGGTGCCAGTTGAGACCATTAGATACAATTTTCACTGTGTGAAATTGTTATCC  |
| OCT-Staple-114 | TCAGAGCTGGGTAAACGACGGCCAGTGCATCCCCGTAGTAGCATTAAACATCCA  |
| OCT-Staple-115 | TTAGCGGTACAGAGCGGGAGAATTAAGTGCCTAATTCGGAACCTATTATTCT    |
| OCT-Staple-116 | TGATTATCAACTTTACAATAAAGGAATCCAAAAAGTTTGAGTAACATTATCAT   |
| OCT-Staple-117 | GTAGCGCCATTAATTGGGAATTAGAGCGCAAGGCGCACCGTAATCAGTAGCGA   |
| OCT-Staple-118 | AGCCGAAAGTCTCTCTTTTGATGATACAAGTGCCTTAAGAGCAAGAAACAATGA  |
| OCT-Staple-119 | GTGGGAAATCATATAAATATTTAAATTTGAATTTTTGTCTGGCCTTCCTGTAGCC |
| OCT-Staple-120 | CCCACGCGCAAATGGTTGAGTGTGTTTCGTGGACTTGCTTTCGAGGTGAATTT   |

87 **Supplementary Table 4.** Sequence list of produced DNA origami octahedron structure. Without further strands  
88 ('sticky ends'), this DNA structure will not be capable of binding to other origami.

89 **External Staples ('Sticky Ends')**

| Sequence Name | Sequence                                                                                    |
|---------------|---------------------------------------------------------------------------------------------|
| Vertex A-1    | AGAGCCTAATTGATTTTTGTTTAAATCCTGAAATAAAGAATTTTTTTTTTTTTTTTTTTT +<br>(Binding Sequence)        |
| Vertex A-2    | TGTAGCATTCACGTTAGTAAATGAAGTGCCGCGCCACCCTTTTTTTTTTTTTTTTTTTT +<br>(Binding Sequence)         |
| Vertex A-3    | GAAACATGAAAGCTCAGTACCAGGCGAAAAATGCTGAACAAATTTTTTTTTTTTTTTTTTTT +<br>(Binding Sequence)      |
| Vertex A-4    | TTTGC GGAAACAATGGCAATTCATCAATCTGTATAATAATTTTTTTTTTTTTTTTTTTTTT +<br>(Binding Sequence)      |
| Vertex B-1    | AAAGATTCATCAGGAATTACGAGGCATGCTCATCCTTATGCGTTTTTTTTTTTTTTTTTTTTT +<br>(Binding Sequence)     |
| Vertex B-2    | CTTCATCAAGAGAAATCAACGTAACAGAGATTGTCAATCATTTTTTTTTTTTTTTTTTTTTT +<br>(Binding Sequence)      |
| Vertex B-3    | CAAATGCTTTAAAAAATCAGGCTTTAAGAGCAGCCAGAGGGTTTTTTTTTTTTTTTTTTTTT +<br>(Binding Sequence)      |
| Vertex B-4    | AAACGAAAGAGGGCGAAACAAAGTACTGACTATATTCGAGCTTTTTTTTTTTTTTTTTTTTTT +<br>(Binding Sequence)     |
| Vertex C-1    | AGCTTTCATCAACGGATTGACCGTAAAATCGTATAATTTTTTTTTTTTTTTTTTTTTTTTTT +<br>(Binding Sequence)      |
| Vertex C-2    | ACTGTTGGGAAGCAGCTGGCGAAAAGGATAGGTCAAGATCGCATTTTTTTTTTTTTTTTTTTTTT +<br>(Binding Sequence)   |
| Vertex C-3    | GGTAGCTATTTAGAGAATCGATGAAAACATTAAATGTGTAGTTTTTTTTTTTTTTTTTTTTTTT +<br>(Binding Sequence)    |
| Vertex C-4    | ATAAATCATACATAAATCGGTTGTACTGTGCTGGCATGCCTGTTTTTTTTTTTTTTTTTTTTTTT +<br>(Binding Sequence)   |
| Vertex D-1    | TGATTGCTTTGAGCAAAAAGAAGATGAAATAGCAGAGGTTTTGTTTTTTTTTTTTTTTTTTTTTTT +<br>(Binding Sequence)  |
| Vertex D-2    | AACGGGTATTAAGGAATCATTACGCCAGTAATCAACAATTTTTTTTTTTTTTTTTTTTTTTTTT +<br>(Binding Sequence)    |
| Vertex D-3    | CAACGCTAACAGCAGAGGCATTTCAATCCAATGATAAATTTTTTTTTTTTTTTTTTTTTTTTTT +<br>(Binding Sequence)    |
| Vertex D-4    | ATCAAAATCATATATGTAATGCTGAACAAACACTTGCTCTTTTTTTTTTTTTTTTTTTTTTTTTT +<br>(Binding Sequence)   |
| Vertex E-1    | GGCCCTGAGAGAAGCAGGCGAAAATCATTGCGTAGAGGCGTTTTTTTTTTTTTTTTTTTTTTTTT +<br>(Binding Sequence)   |
| Vertex E-2    | CTTAAACAGCTTATATATTCGGTCGCTTGATGGGGAACAAGATTTTTTTTTTTTTTTTTTTTTTTT +<br>(Binding Sequence)  |
| Vertex E-3    | GCTCACAATTCGTGAGCTAACTCACTGGAAGTAATGGTCAATTTTTTTTTTTTTTTTTTTTTTTTTT +<br>(Binding Sequence) |
| Vertex E-4    | TTTGC GGATGGCCAACTAAAGTACGGGCTGCAGCTACAGAGTTTTTTTTTTTTTTTTTTTTTTTTT +<br>(Binding Sequence) |
| Vertex F-1    | GACAGGAGGTTGAAACAAATAAATCCGCCCCCTCCGCCACCCTTTTTTTTTTTTTTTTTTTTTTTT +<br>(Binding Sequence)  |
| Vertex F-2    | CAGAATCAAGTTTCGGCATTTTCGGTTAAATATATCACCAGTTTTTTTTTTTTTTTTTTTTTTTTT +<br>(Binding Sequence)  |



|                    |                                                                                         |
|--------------------|-----------------------------------------------------------------------------------------|
|                    | (Binding Sequence)                                                                      |
| Vertex F-3         | TCATATGGTTTACGATTGAGGGAGGGAAACGCAATACATATTTTTTTTTTTTTTTTTTTT +<br>(Binding Sequence)    |
| Vertex F-4         | AATAGCAATAGCACCAGAAGGAAACCTAAAGCCACTGGTAATTTTTTTTTTTTTTTTTTTTTT +<br>(Binding Sequence) |
| Binding Sequence A | ACCTACAC                                                                                |
| Binding Sequence B | GTGTAGGT                                                                                |

90 **Supplementary Table 5.** Externally facing sticky ends located at the 6 vertices of the octahedron origami frame.  
91 There are 4 sequences (1-4) present at each vertex (A-F), where our designs keep the 'Binding Sequence' the  
92 same for these 4 sequences. The Binding Sequences are listed at the end of the tables.

93 **Supplementary Figures**

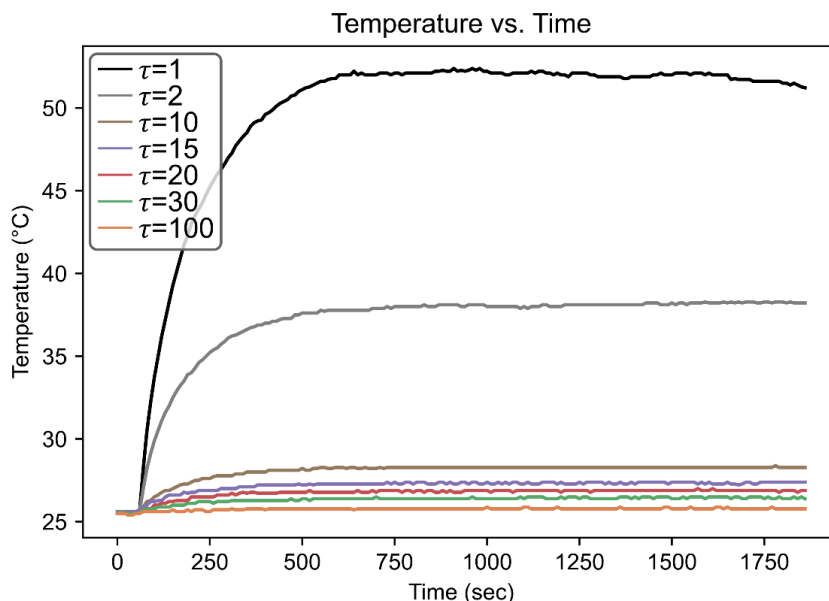

94  
 95 **Supplementary Figure 1.** Temperature change induced by the acoustic waves in the active region.  $\tau$  is defined  
 96 as the period divided by the pulse length.  $\tau=1$  means constant waves are applied. Waves were applied after 60  
 97 seconds at room temperature (25.5 °C) without the use of active temperature control.  $\tau$  values in the experiments  
 98 conducted were between 10 – 100. Thermal paste was used to ensure proper temperature measurement of the  
 99 active region.

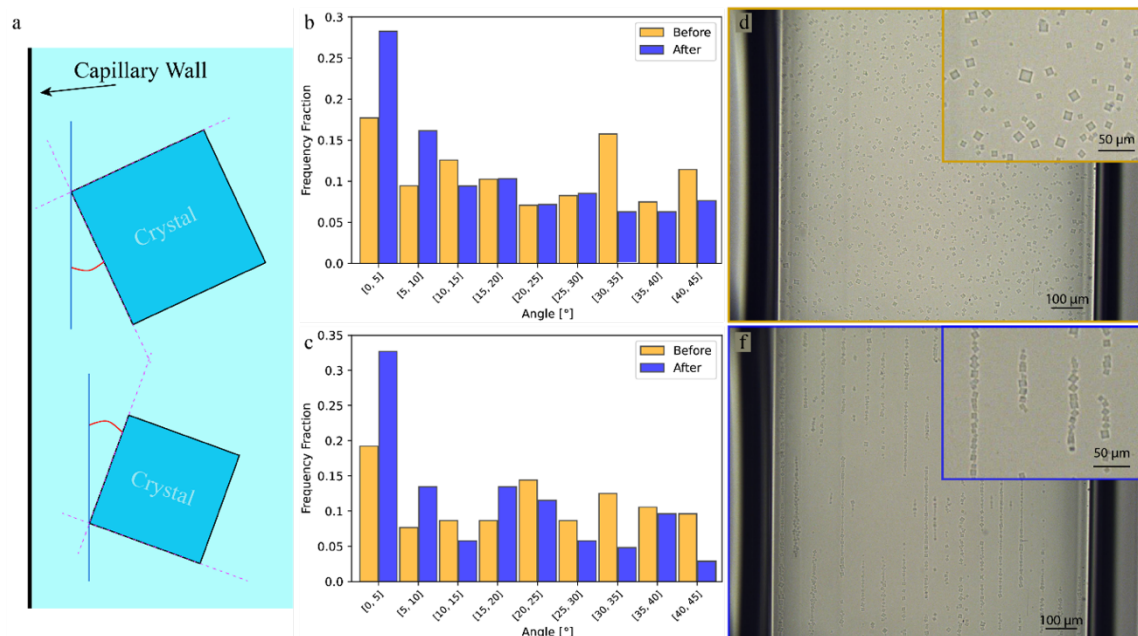

100  
 101 **Supplementary Figure 2.** Orientation of crystals before and after acoustic organization. **a.** Schematic of how  
 102 the orientation of crystals was measured. The angle is always between 0° to 45°. **b,c.** Histogram of two separate  
 103 experiments where the angles of individual crystals were measured before and after acoustic waves were applied.  
 104 Panel **b** Before n=254, After n=223; Panel **c** Before n=104, After n=104. **d,f.** Images corresponding to the  
 105 Histogram in panel **b**, before (**d**) and after (**f**) the acoustic waves. The Histogram in panel **(c)** corresponded to  
 106 Supplementary Movie 2.

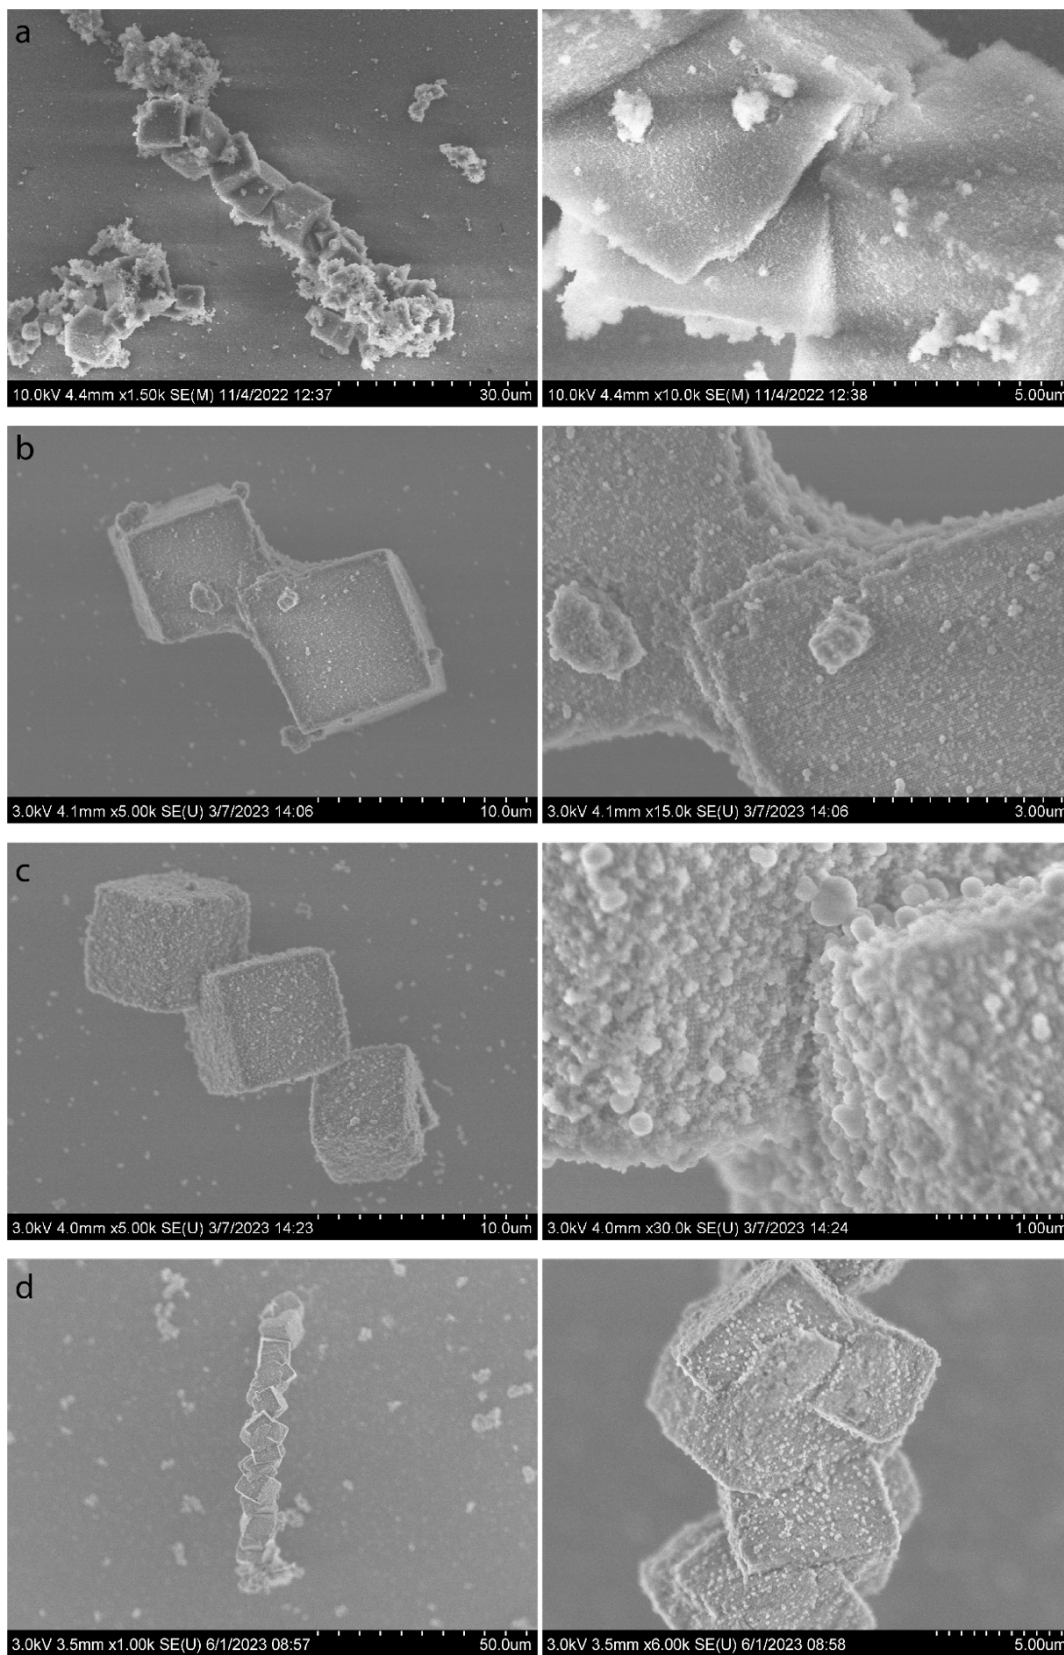

107  
 108 **Supplementary Figure 3. a-d.** Additional SEM images of fused crystals after reannealing. Zoomed-out (left)  
 109 and zoomed-in (right) images of the same region.

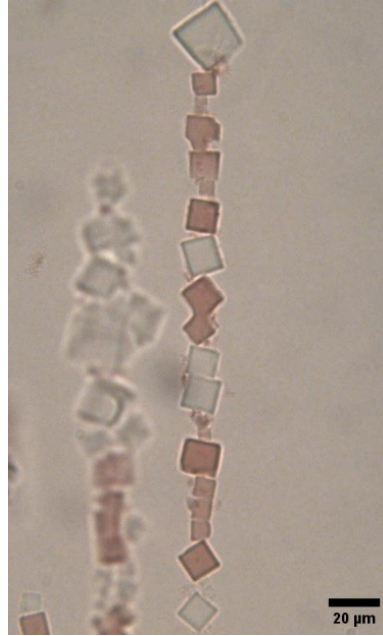

110  
111  
112

**Supplementary Figure 4.** Crystals are arranged linearly by acoustic field. Crystals filled with AuNPs are red, while empty crystals are clear.

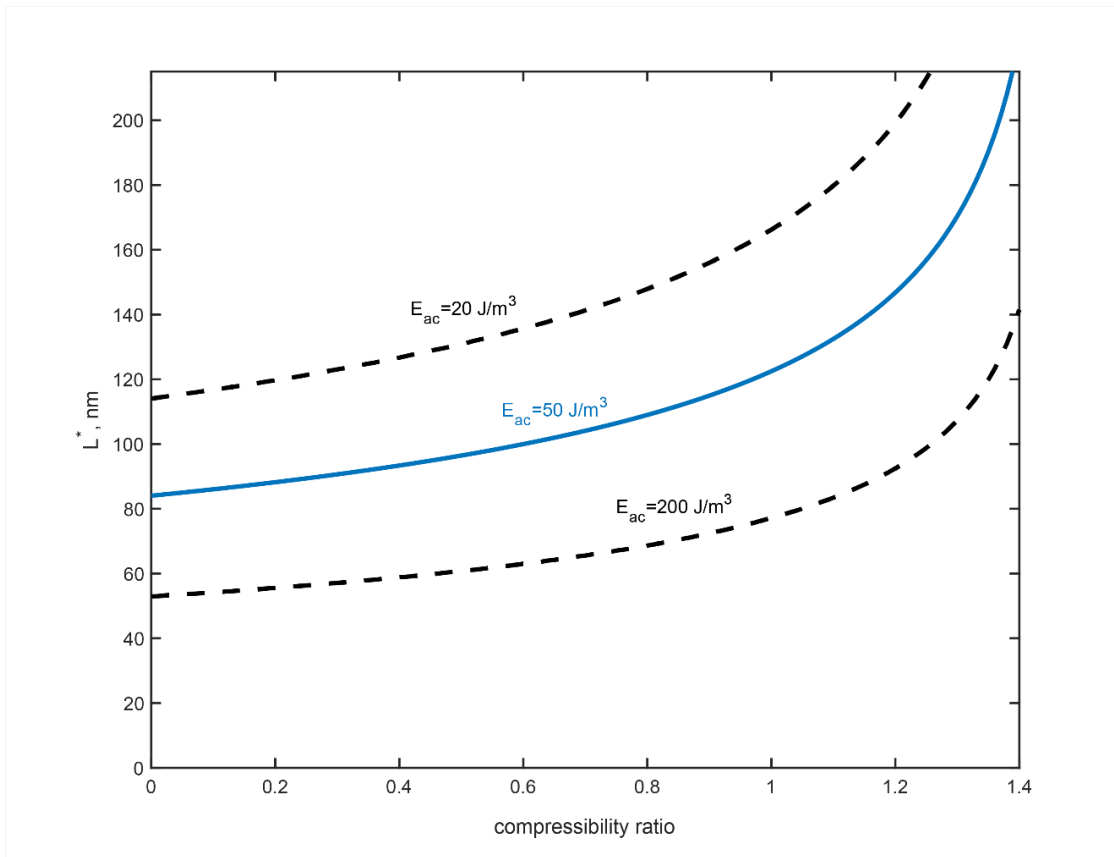

113  
114  
115  
116

**Supplementary Figure 5.** Edge length threshold ( $L^*$ ) vs the compressibility ratio ( $\beta_{DNA}/\beta_{H_2O}$ ) calculated for a range of acoustic energy densities between 20 and 200  $\text{J/m}^3$ , where 50  $\text{J/m}^3$  (blue) is the estimated energy density for this study (Supplementary Table 2).

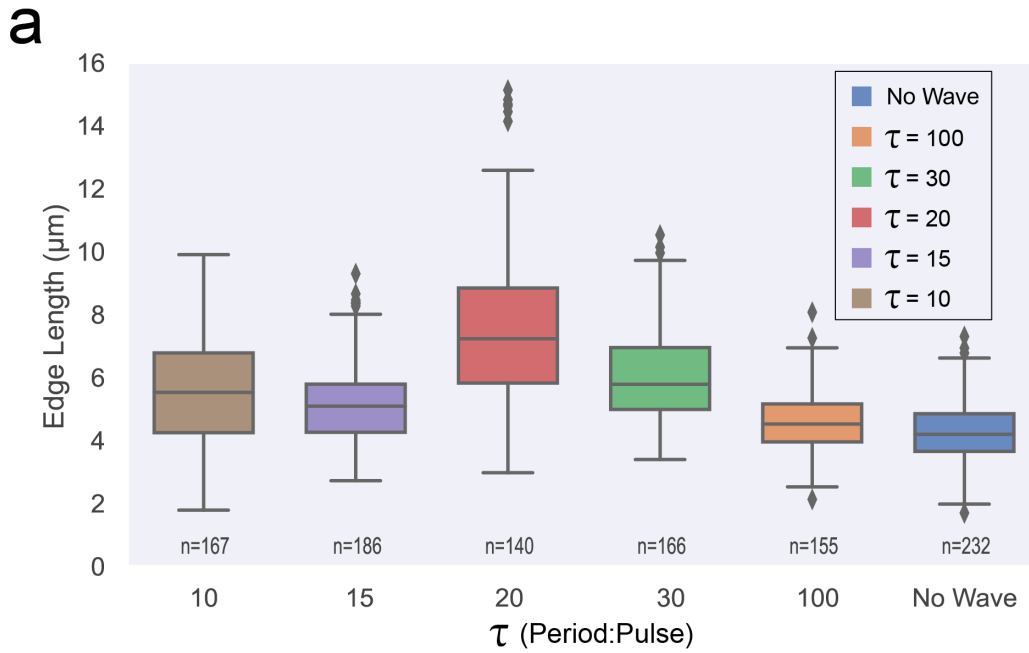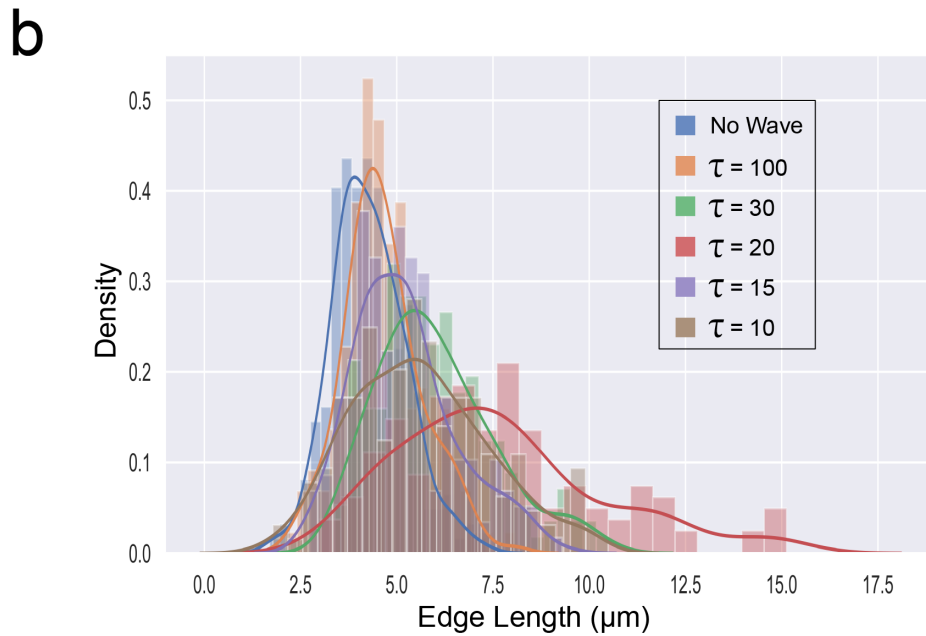

117

118 **Supplementary Figure 6. a.** Edge length box plot and distribution of crystals after formation with acoustic wave  
 119 pulses with a *fast* temperature decrease rate of 0.03 °C/min. **b.** Edge length distribution of crystals after  
 120 formation with acoustic wave pulses with a *fast* temperature rate of 0.03 °C/min.

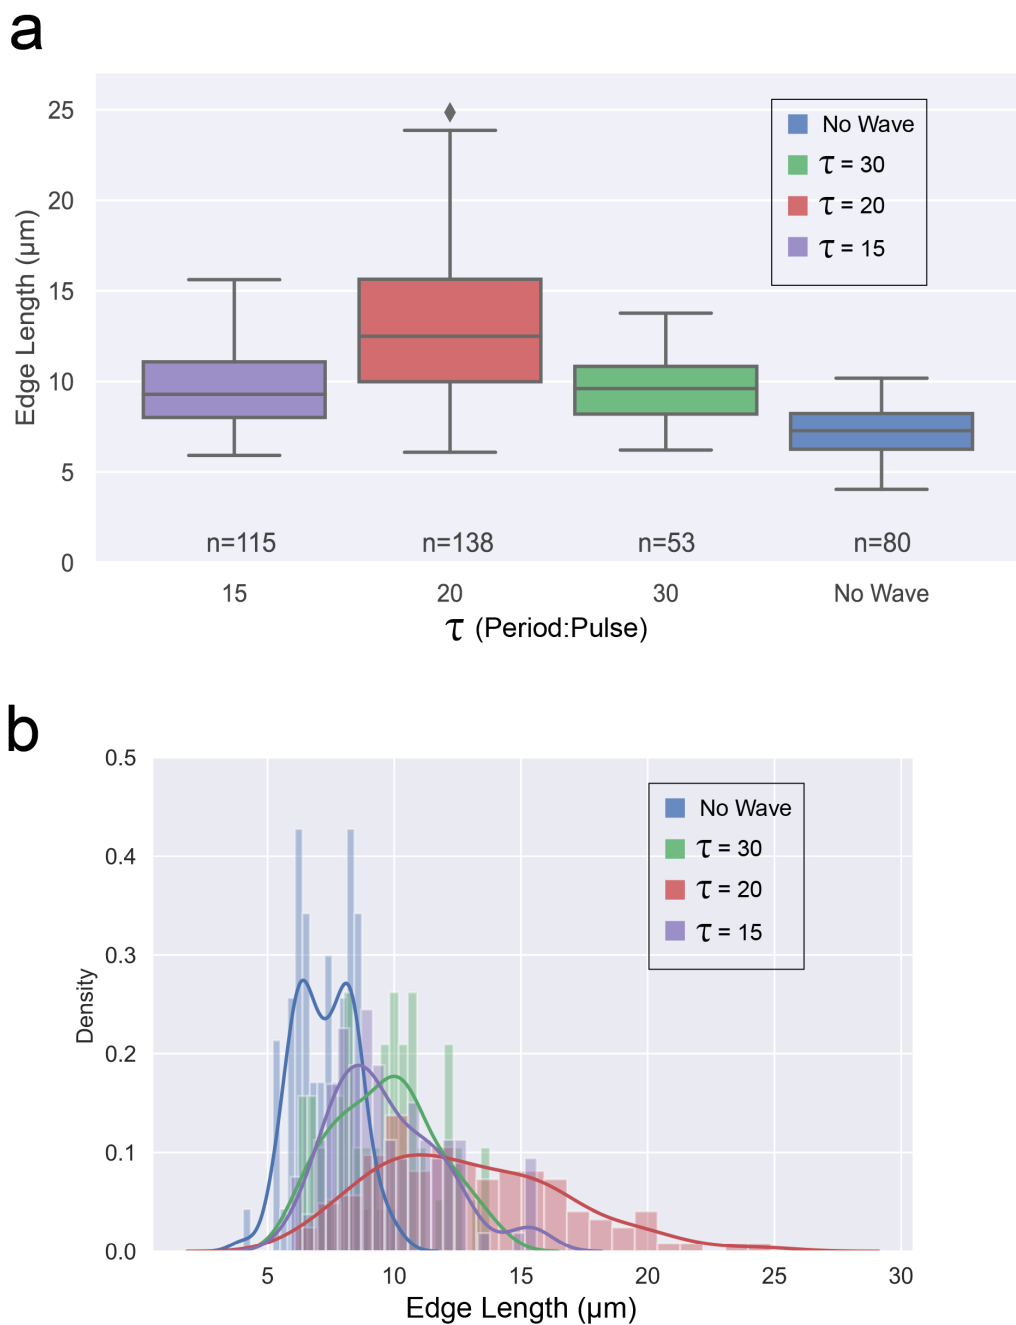

121

122 **Supplementary Figure 7. a.** Edge length box plot and distribution of crystals after formation with acoustic wave  
 123 pulses with a 'slow' temperature decrease rate of 0.01 °C/min. **b.** Edge length distribution of crystals after  
 124 formation with acoustic wave pulses under a 'slow' temperature rate of 0.01 °C/min.

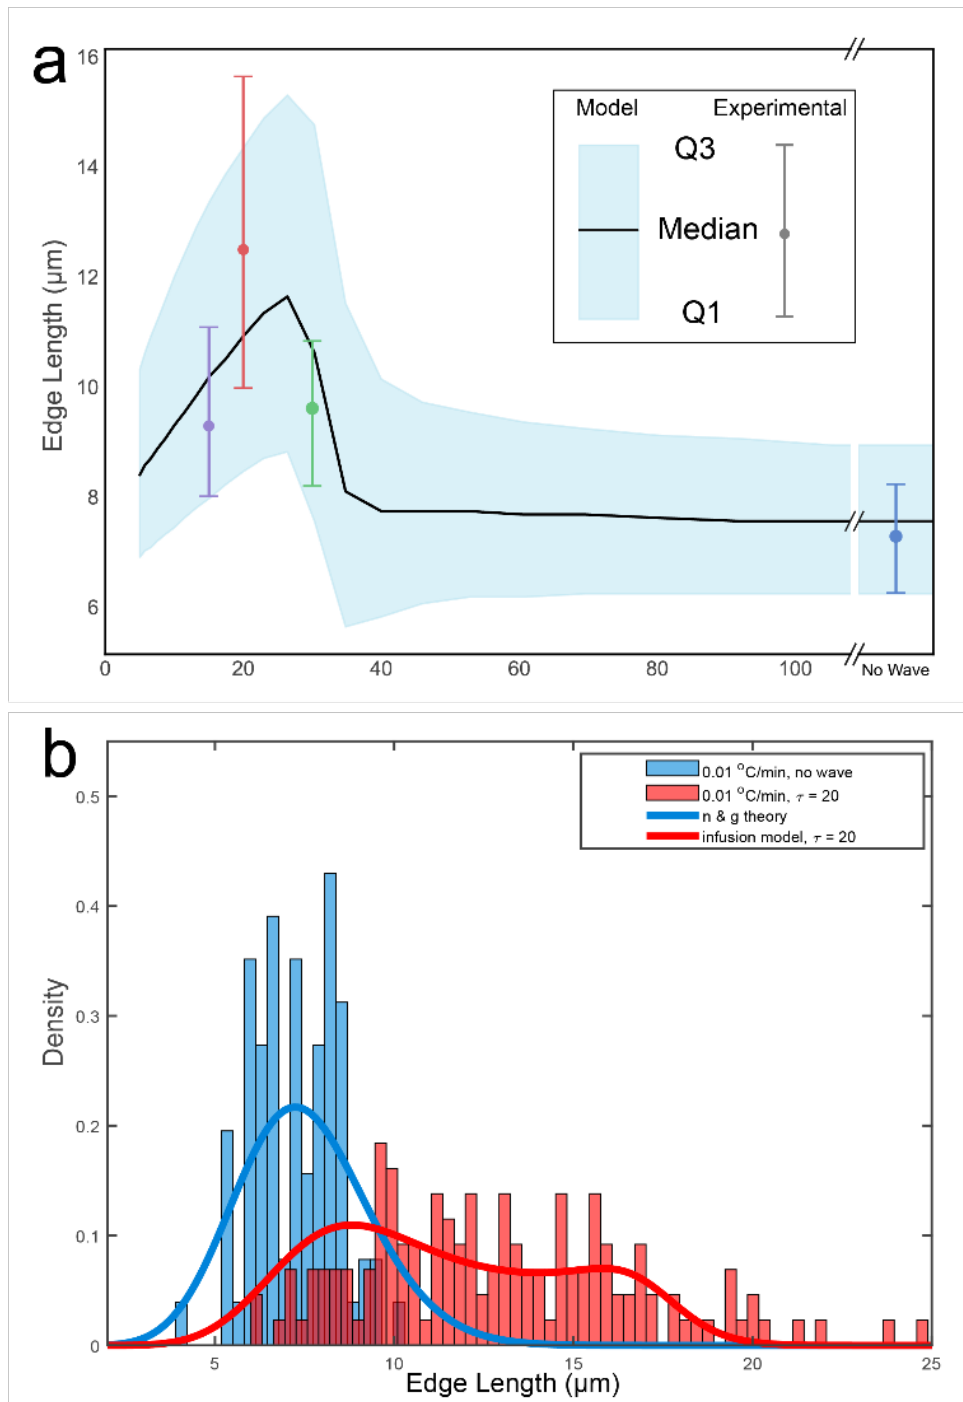

125

126 **Supplementary Figure 8. a.** Summary of crystal edge lengths vs.  $\tau$  as calculated from the model and observed  
 127 by the experimental data with a 'slow' temperature ramp of 0.01 °C/min. **b.** Histogram of crystal size distribution  
 128 with no acoustic waves (blue) and with  $\tau = 20$  (red) for thermal ramp down of 'slow' 0.01 °C/min. The nucleation  
 129 and growth theoretical fit (blue line) and the infusion model (red line) take into consideration the effect of the  
 130 acoustic field.

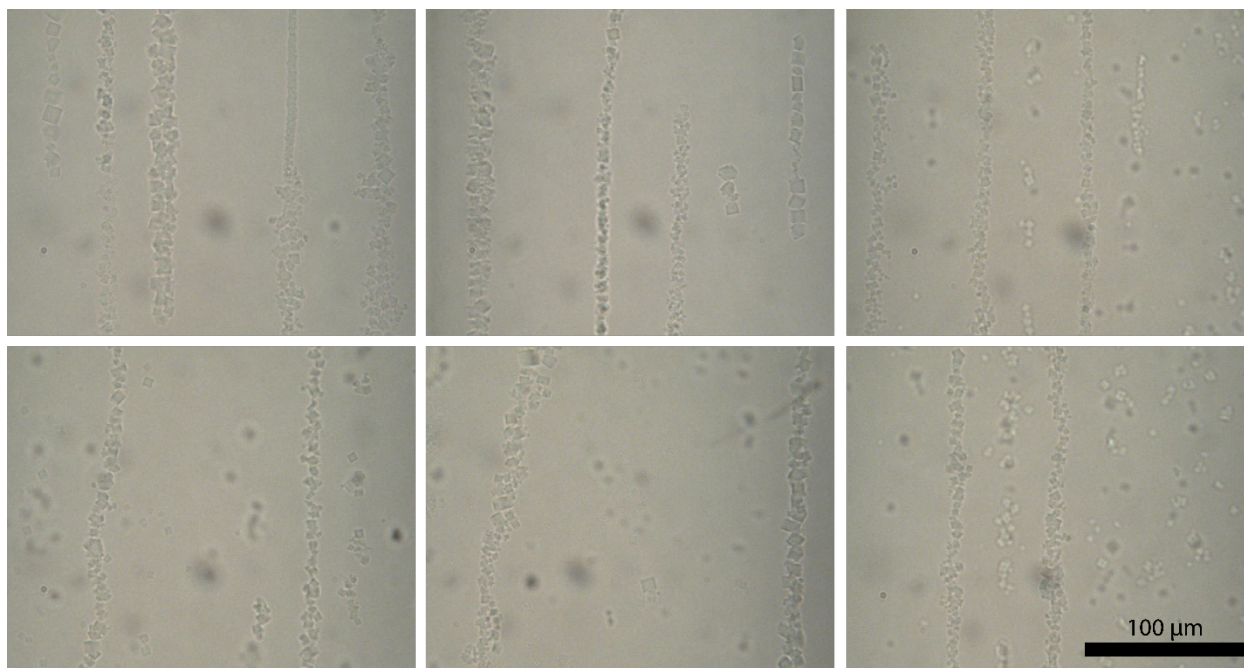

131  
 132 **Supplementary Figure 9.** Microscopy images of crystals after formation with acoustic wave pulses with a ‘fast’  
 133 temperature decrease rate of 0.03 °C/min with an acoustic pulse every 500 ms ( $\tau = 10$ ).

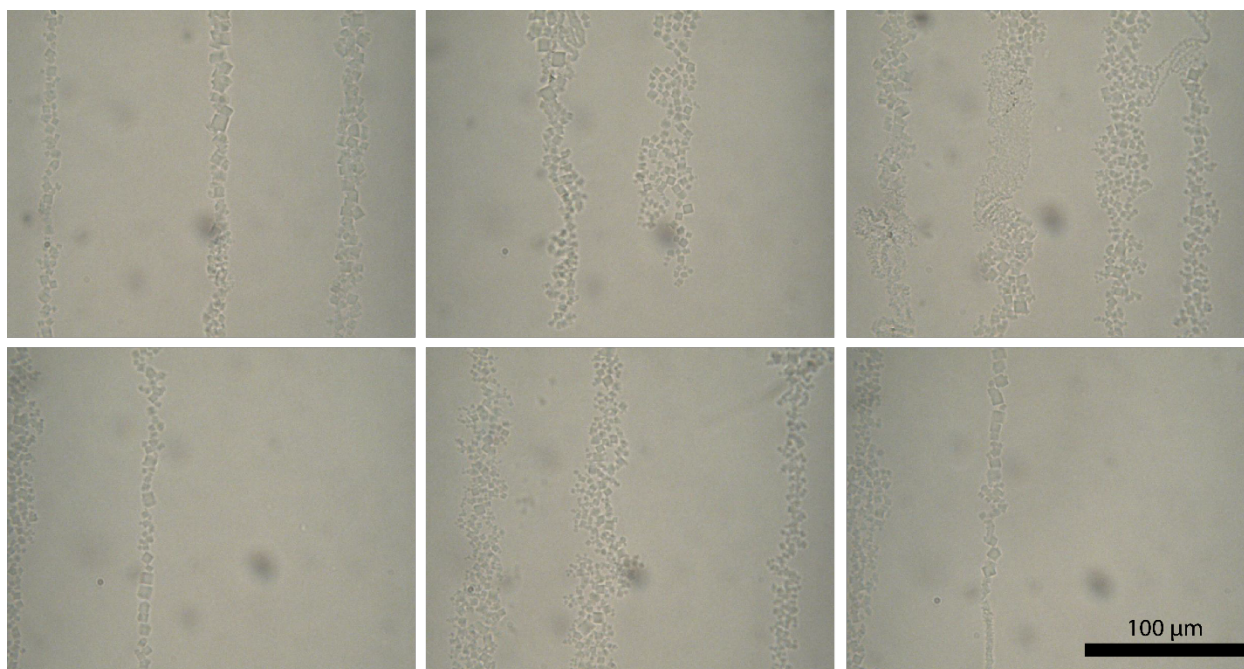

134  
 135 **Supplementary Figure 10.** Microscopy images of crystals after formation with acoustic pulses with a ‘fast’  
 136 temperature decrease rate 0.03 °C/min with an acoustic pulse every 750 ms ( $\tau = 15$ ).



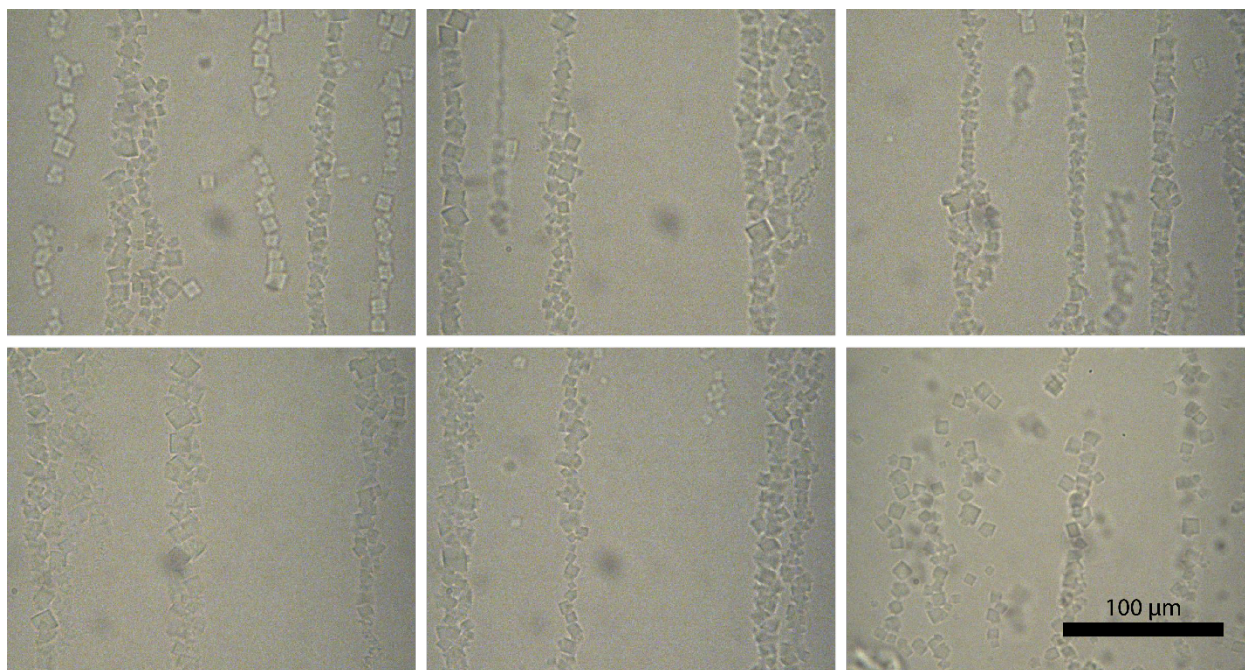

137  
 138 **Supplementary Figure 11.** Microscopy images of crystals after formation with acoustic wave pulses with a  
 139 '*fast*' temperature ramp of 0.03 °C/min with an acoustic pulse every 1000 ms ( $\tau = 20$ ).

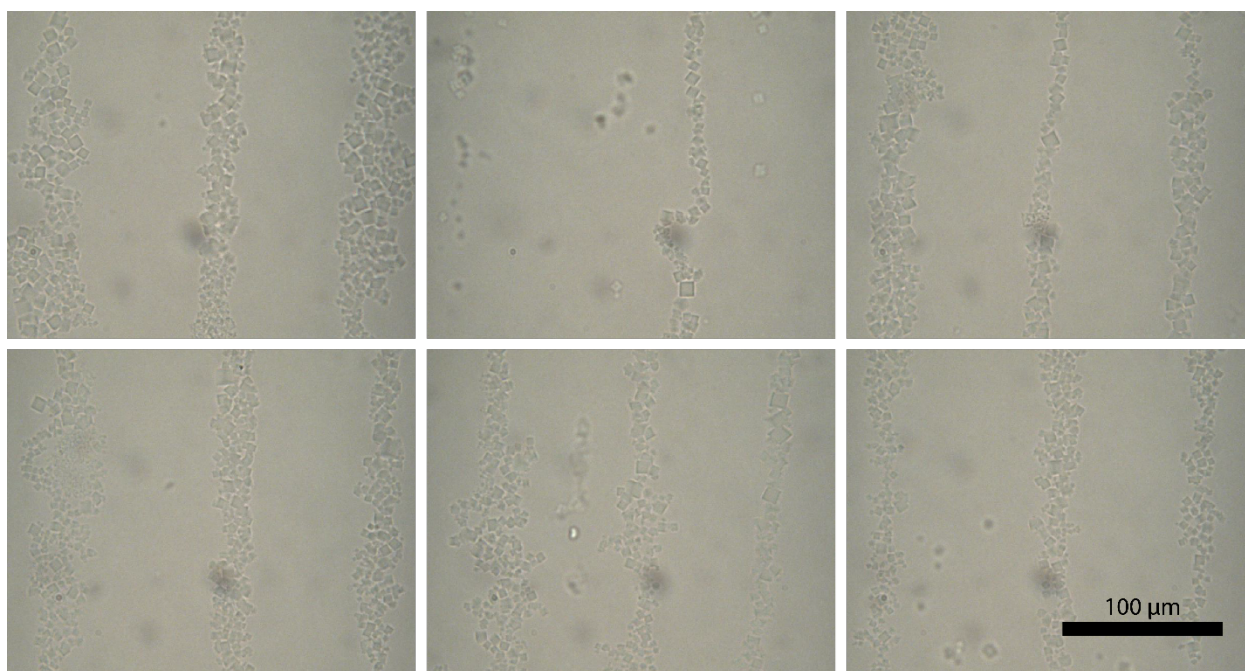

140  
 141 **Supplementary Figure 12.** Microscopy images of crystals after formation with acoustic wave pulses with a  
 142 '*fast*' temperature decrease rate 0.03 °C/min with an acoustic pulse every 1500 ms ( $\tau = 30$ ).

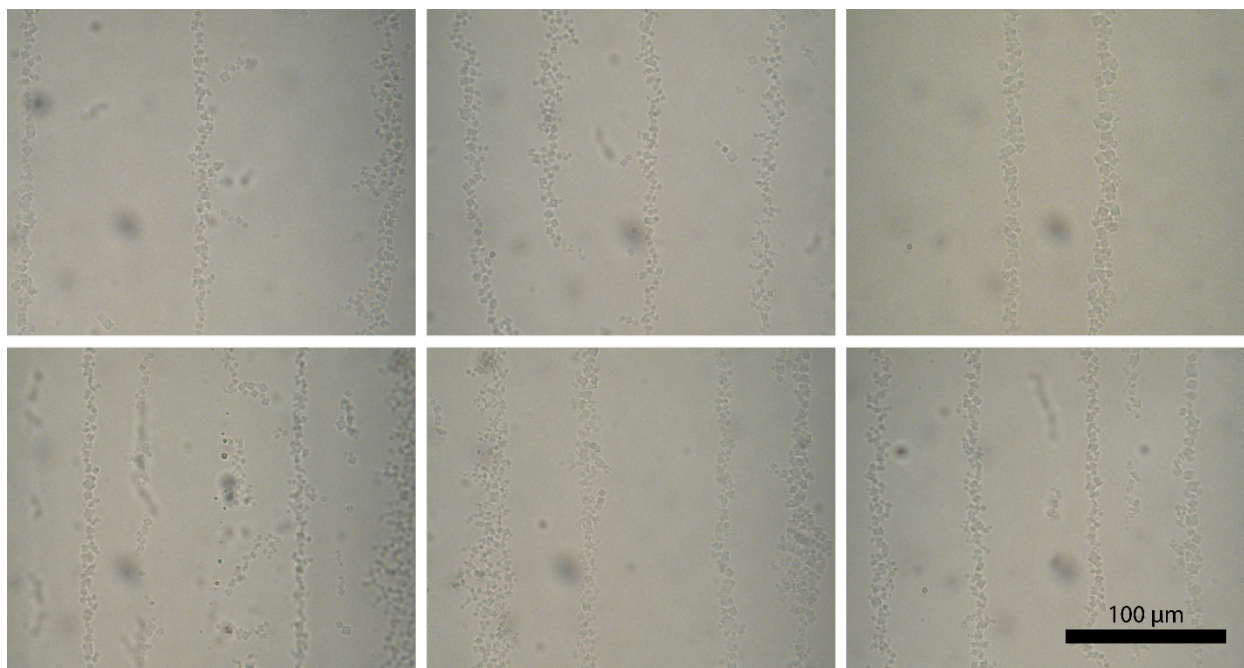

143  
144 **Supplementary Figure 13.** Microscopy images of crystals after formation with acoustic wave pulses with a  
145 '*fast*' temperature decrease rate of 0.03 °C/min with an acoustic pulse every 5000 ms ( $\tau = 100$ ).

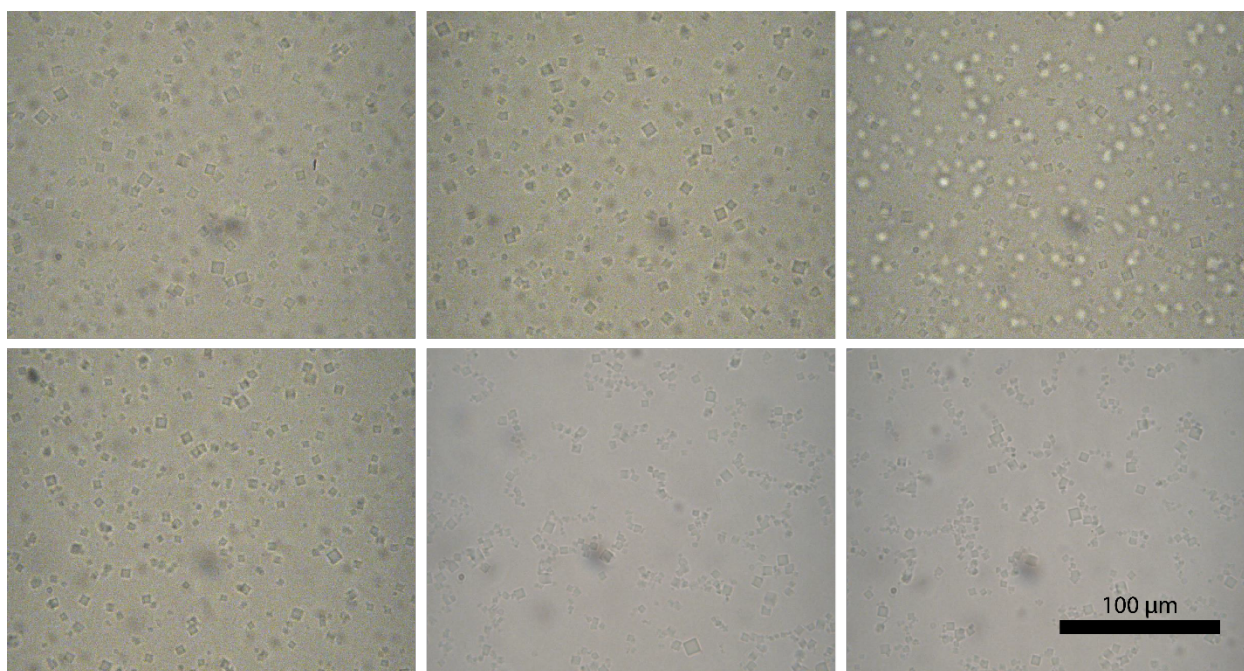

146  
147 **Supplementary Figure 14.** Microscopy images of crystals after formation with no acoustic wave pulses with a  
148 '*fast*' temperature decrease rate of 0.03 °C/min ( $\tau = \infty$ ).

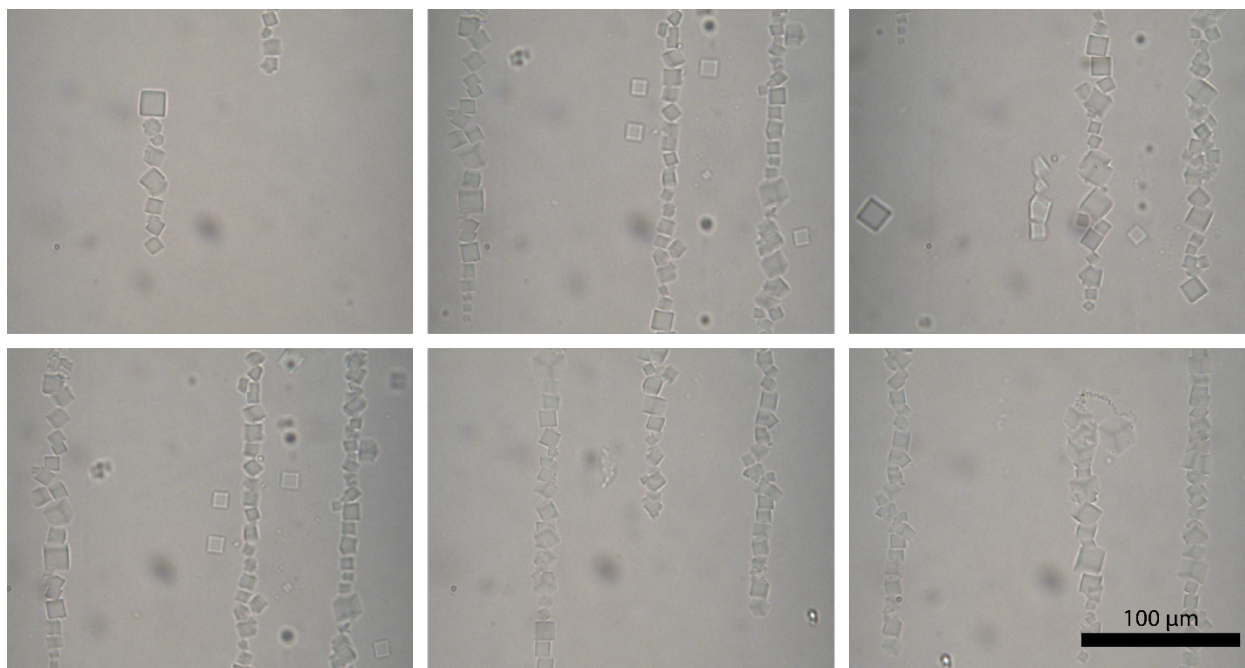

149  
 150 **Supplementary Figure 15.** Microscopy images of crystals after formation with acoustic wave pulses with a  
 151 ‘slow’ temperature decrease rate of 0.01 °C/min with an acoustic pulse every 750 ms ( $\tau = 15$ ).

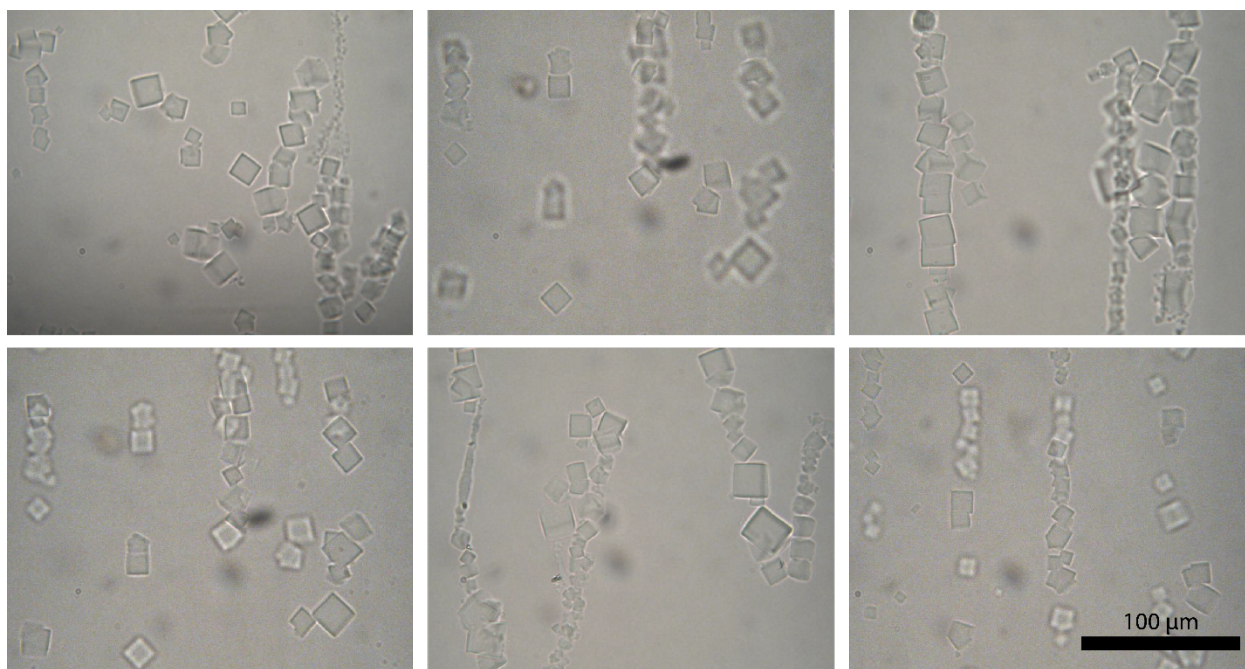

152  
 153 **Supplementary Figure 16.** Microscopy images of crystals after formation with acoustic wave pulses with a  
 154 ‘slow’ temperature decrease rate of 0.01 °C/min with an acoustic pulse every 1000 ms ( $\tau = 20$ ).

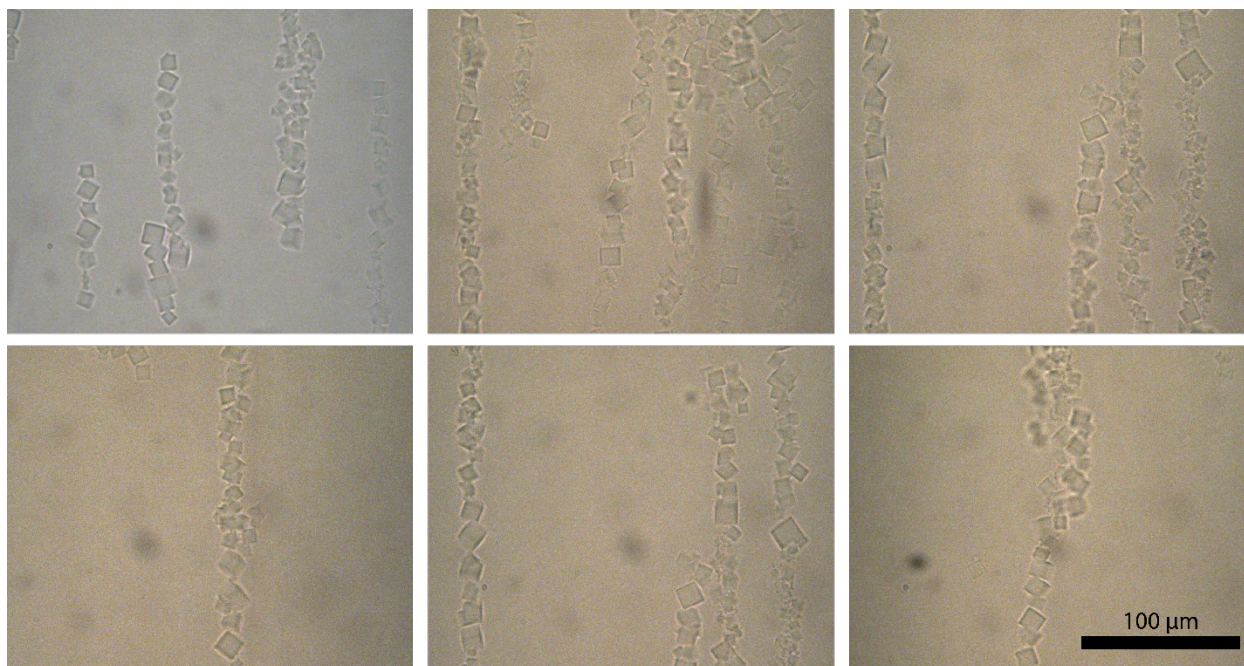

155  
 156 **Supplementary Figure 17.** Microscopy images of crystals after formation with acoustic wave pulses with a  
 157 'slow' temperature decrease rate of 0.01 °C/min with an acoustic pulse every 1500 ms ( $\tau = 30$ ).

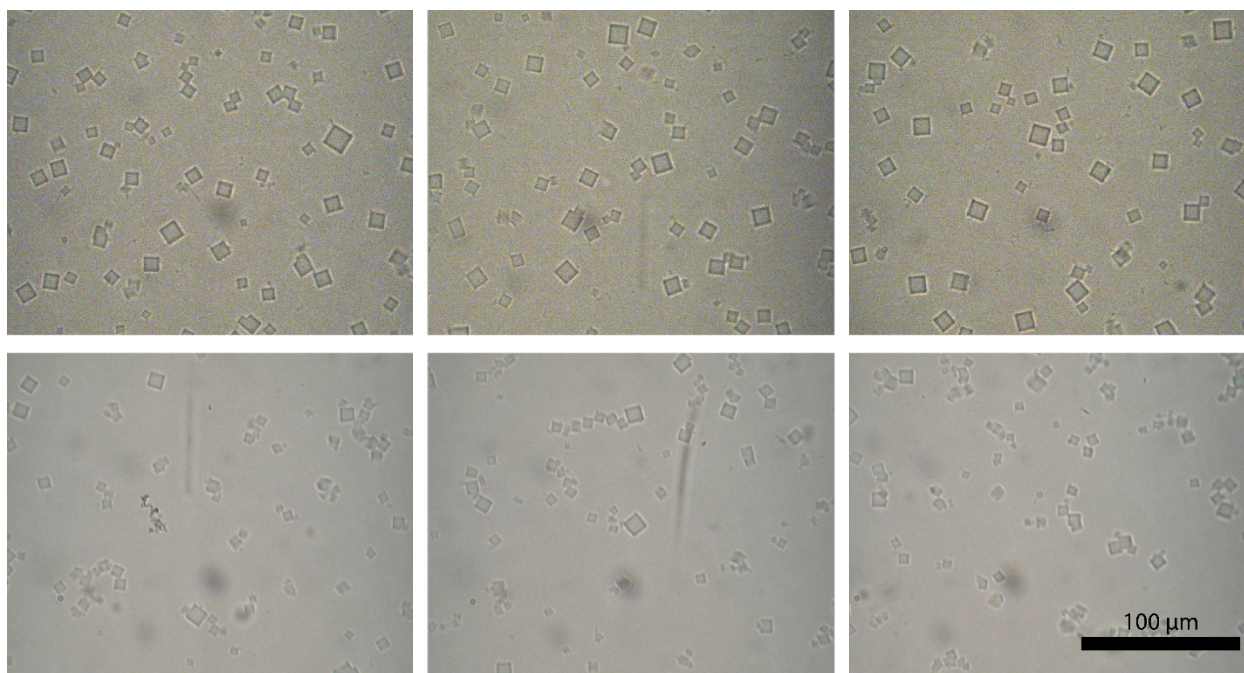

158  
 159 **Supplementary Figure 18.** Microscopy images of crystals after formation with no acoustic wave pulses with a  
 160 'slow' temperature decrease rate of 0.01 °C/min ( $\tau = \infty$ ).

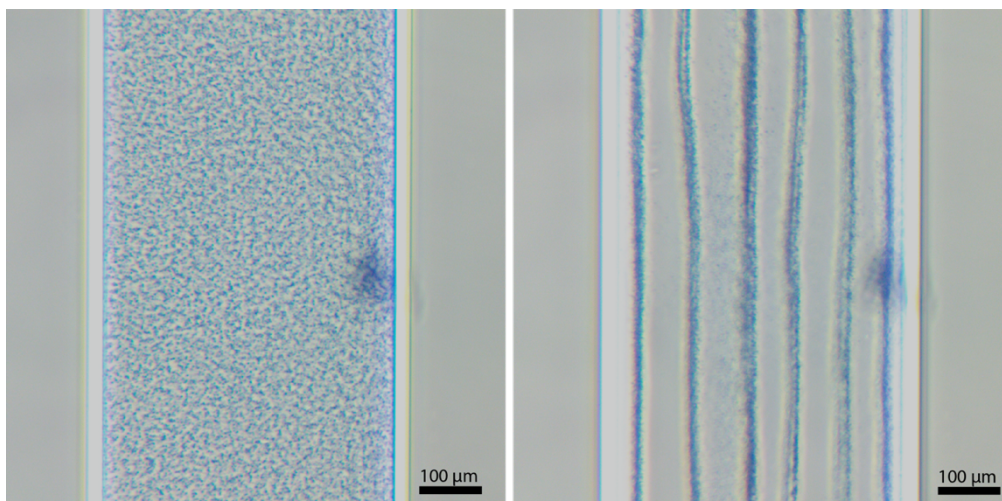

161  
162 **Supplementary Figure 19.** Polystyrene beads of 1  $\mu\text{m}$  diameter, in a 1 mm wide capillary. The beads are  
163 dispersed in the capillary (left image) and then arranged by a pulse of 50ms acoustic waves every 1 second ( $\tau$   
164 = 20). The corresponding video can be viewed in Supplementary Movies (Supplementary Movie 5).

### 165 **Supplementary References**

- 166 1. Schindelin, J. et al. Fiji: an open-source platform for biological-image analysis. *Nat. Methods* 9, 676–682 (2012).  
167 2. Yager, K. G., Zhang, Y., Lu, F. & Gang, O. Periodic lattices of arbitrary nano-objects: modeling and applications  
168 for self-assembled systems. *J. Appl. Crystallogr.* 47, 118–129 (2014).  
169 3. Yager, K.G., Zhang, Y., Lhermitte, J. ScatterSim (<https://github.com/CFN-softbio/scattersim>).  
170 4. Van Assche, D. Acoustophoretic manipulation of sub-micron particles. (2017).
