# Supplementary material for: Acoustically shaped DNA-programmable materials
Source: PubMed Central journal article supplement — Nat Commun. 2024 Aug 11;15:6875. doi: 10.1038/s41467-024-51049-7 (PMC11317520; doi:10.1038/s41467-024-51049-7), 2024-08-11
Supplement: 41467_2024_51049_MOESM3_ESM.pdf [file 41467_2024_51049_MOESM3_ESM.pdf]

## Description of Additional Supplementary Files

**Supplementary Movie 1** – Preformed lattices dispersed in a 1 mm capillary. The applied standing acoustic waves push crystallites into the nodes. Magnification is initially x10, and x50 towards the end of the video.

**Supplementary Movie 2** – Preformed lattices dispersed in a 1 mm capillary. Standing acoustic waves are then applied, resulting in crystallites moving to the nodes. Crystal orientation was measured before and after the acoustic waves were applied.

**Supplementary Movie 3** – Monomers of the octahedron origami were dispersed in a capillary. Lattices were formed with a thermal anneal (0.01 °Cpm) with no acoustic waves ( $\tau=\infty$ ).

**Supplementary Movie 4** – Monomers of the octahedron origami were dispersed in a capillary. Lattices were formed with a thermal anneal (0.01 °Cpm) with an acoustic wave pulse of 50 ms every 1 second ( $\tau=20$ ).

**Supplementary Movie 5** – Polystyrene beads of 1  $\mu\text{m}$  diameter in a 1 mm wide capillary. The beads are dispersed in the capillary (left image) and then arranged by a pulse of 50ms acoustic waves every 1 second ( $\tau = 20$ ).

**Supplementary Movie 6** – Monomers of the octahedron origami were dispersed in a capillary. Lattices were formed with a thermal anneal (0.03 °Cpm) with acoustic wave pulse of 50 ms every 1 second ( $\tau=20$ ).

**Supplementary Movie 7** – Monomers of the octahedron origami were dispersed in a capillary. Lattices were formed with a thermal anneal (0.03 °Cpm) with acoustic wave pulse of 50 ms every 1 second ( $\tau=100$ ).
